# Supplementary material
Source: PubMed Central journal article supplement (PMC3320243)
Supplement: supp_en.2011-1915_Suppl_Fig_1_Scatter_plot.pdf [file supp_en.2011-1915_Suppl_Fig_1_Scatter_plot.pdf]

Supplemental Fig. 1

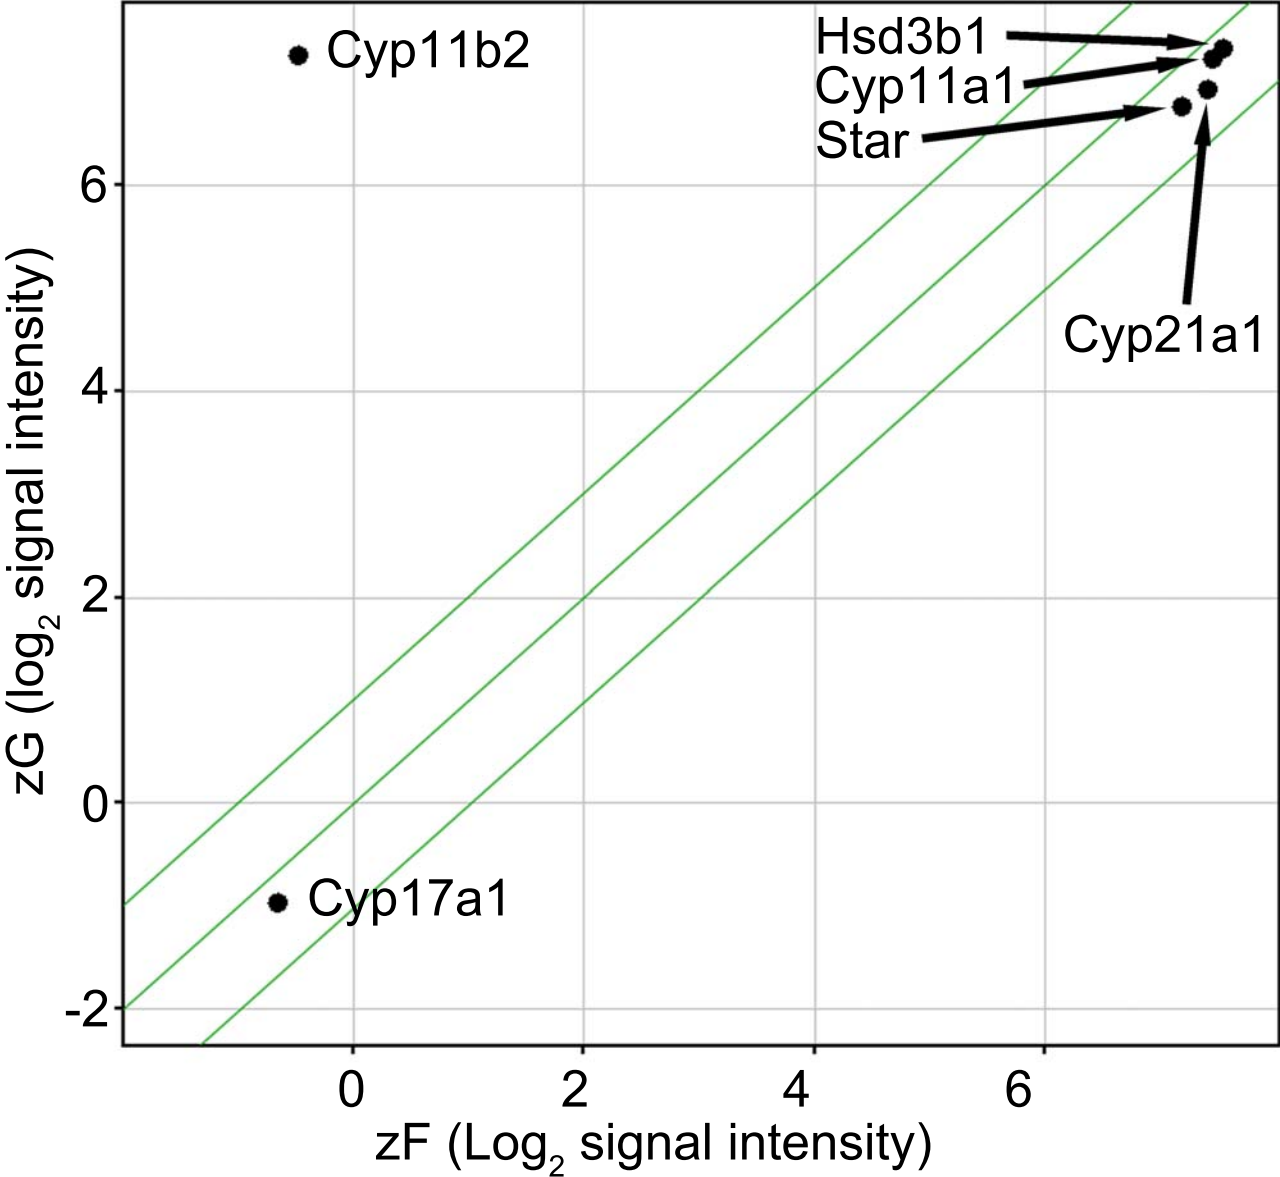

1 **Supplemental Fig. 1.** Microarray scatter plot showing pooled data of  
2 transcripts involved in adrenal steroidogenesis from 4 zona glomerulosa (zG)  
3 and 4 zona fasciculata (zF) samples. Each spot indicates a unique probe for  
4 *Star*, *Cyp11a1*, *Hsd3b1*, *Cyp21a1*, *Cyp11b2* and *Cyp17* transcripts based on  
5 normalized microarray data. A dot outside of the parallel lines represents a  
6 transcript with greater than two-fold differences in expression.
